# Supplementary material for: Exploring the mechanism of action of Modified Simiao Powder in the treatment of osteoarthritis: an in-silico study
Source: Front Med (Lausanne). 2024 Oct 18;11:1422306. doi: 10.3389/fmed.2024.1422306 (PMC11527633; doi:10.3389/fmed.2024.1422306)
Supplement: Supplementary file 6 [file Table_6.XLSX]

## Sheet: Sheet1
name	Molecule Name	Smile	tape	Closeness unDir	Closeness unDir	Degree unDir
HB7	quercetin	C1=CC(=C(C=C1C2=C(C(=O)C3=C(C=C(C=C3O2)O)O)O)O)O	mol	0.000921659	90199.3	272
RDT1	Kaempferol	C1=CC(=CC=C1C2=C(C(=O)C3=C(C=C(C=C3O2)O)O)O)O	mol	0.000710732	24717.1	126
RDT2	Luteolin	C1=CC(=C(C=C1C2=CC(=O)C3=C(C=C(C=C3O2)O)O)O)O	mol	0.000691085	35932.3	112
HB23	berberine	COC1=C(C2=C[N+]3=C(C=C2C=C1)C4=CC5=C(C=C4CC3)OCO5)OC	mol	0.000669792	39368.9	74
YYR4	CLR	CC(C)CCC[C@@H](C)[C@H]1CC[C@H]2[C@@H]3CC=C4C[C@@H](O)CC[C@]4(C)[C@H]3CC[C@@]21C	mol	0.000645578	50344.8	70
CZ9	wogonin	COC1=C(C=C(C2=C1OC(=CC2=O)C3=CC=CC=C3)O)O	mol	0.000626174	6749.78	46
HB34	Chelerythrine	COc1ccc2c(ccc3c4cc5c(cc4ccc23)OCO5)c1OC	mol	0.000626174	19354.3	39
NX13	beta-sitosterol	CCC(CCC(C)C1CCC2C1(CCC3C2CC=C4C3(CCC(C4)O)C)C)C(C)C	mol	0.0006035	1668.41	18
CZ6	beta-sitosterol 3-O-glucoside_qt	CC[C@@H](CC[C@@H](C)[C@H]1CC[C@@H]2[C@@H]3CC=C4C[C@H](O)CC[C@@]4(C)[C@H]3CC[C@@]21C)C(C)C	mol	0.000599161	1616.73	18
RDT10	(Z)-3-(3,4-Dihydroxyphenyl)Prop-2-Enoic Acid	OC(=O)/C=Cc1ccc(c(c1)O)O	mol	0.000547345	1498.61	15
RDT25	Coumaric Acid	OC(=O)/C=C/c1ccc(cc1)O	mol	0.000510986	565.099	14
RDT4	Chrysoeriol	COC1=C(C=CC(=C1)C2=CC(=O)C3=C(C=C(C=C3O2)O)O)O	mol	0.000518403	92.1053	13
HB15	rutaecarpine	C1CN2C(=NC3=CC=CC=C3C2=O)C4=C1C5=CC=CC=C5N4	mol	0.000592768	2530.77	11
SJC1	formononetin	COC1=CC=C(C=C1)C2=COC3=C(C2=O)C=CC(=C3)O	mol	0.000585823	2865.21	11
SJC3	Stigmasterol	CCC(C=CC(C)C1CCC2C1(CCC3C2CC=C4C3(CCC(C4)O)C)C)C(C)C	mol	0.000557724	627.854	10
SJC5	sitosterol	CCC(CCC(C)C1CCC2C1(CCC3C2CC=C4C3(CCC(C4)O)C)C)C(C)C	mol	0.000567215	443.703	10
HB1	palmatine	COC1=C(C2=C[N+]3=C(C=C2C=C1)C4=CC(=C(C=C4CC3)OC)OC)OC	mol	0.000540833	1519.54	10
CZ5	beta-daucosterol_qt	CC[C@H](CC[C@H](C)[C@H]1CC[C@@H]2[C@@H]3CC=C4C[C@H](O)CC[C@]4(C)[C@H]3CC[C@]12C)C(C)C	mol	0.000558971	318.828	9
HB28	Isocorypalmine	COC1=C(C2=C(CC3C4=CC(=C(C=C4CCN3C2)OC)O)C=C1)OC	mol	0.000526039	4129.12	9
CZ2	Stigmasterol 3-O-beta-D-glucopyranoside_qt	CC[C@H](C=C[C@@H](C)[C@H]1CC[C@@H]2[C@@H]3CC=C4C[C@H](O)CC[C@@]4(C)[C@H]3CC[C@@]21C)C(C)C	mol	0.000532198	291.455	9
CZ8	daucosterol_qt	CC[C@H](CC[C@H](C)[C@H]1CC[C@@H]2[C@@H]3CC=C4C[C@H](O)CC[C@@]4(C)[C@H]3CC[C@]12C)C(C)C	mol	0.000532198	219.062	9
HB19	campesterol	CC(C)C(C)CCC(C)C1CCC2C1(CCC3C2CC=C4C3(CCC(C4)O)C)C	mol	0.000584454	494.815	8
CZ7	daucosterin_qt	CC[C@@H](CC[C@@H](C)[C@H]1CC[C@@H]2[C@@H]3CC=C4C[C@@H](O)CC[C@]4(C)[C@H]3CC[C@@]21C)C(C)C	mol	0.000531632	162.011	8
HB37	coptisine	C1C[N+]2=C(C=C3C=CC4=C(C3=C2)OCO4)C5=CC6=C(C=C51)OCO6	mol	0.000592768	2540.82	8
SJC2	(6E,8E,10Z,12Z,14E,16E,18E,20Z,22Z,24E,26E)-2,6,10,14,19,23,27,31-octamethyldotriaconta-2,6,8,10,12,14,16,18,20,22,24,26,30-tridecaene	CC(=CCCC(=CC=CC(=CC=CC(=CC=CC=C(C)C=CC=C(C)C=CC=C(C)CCC=C(C)C)C)C)C)C	mol	0.000581058	1539.74	8
HB22	poriferast-5-en-3beta-ol	CCC(CCC(C)C1CCC2C1(CCC3C2CC=C4C3(CCC(C4)O)C)C)C(C)C	mol	0.000547345	442.533	8
NX17	baicalein	C1=CC=C(C=C1)C2=CC(=O)C3=C(O2)C=C(C(=C3O)O)O	mol	0.000506842	1187.15	8
HB6	(S)-Canadine	COC1=C(C2=C(CC3C4=CC5=C(C=C4CCN3C2)OCO5)C=C1)OC	mol	0.000513084	2106.15	7
HB30	Cavidine	CC1C2C3=CC(=C(C=C3CCN2CC4=C1C=CC5=C4OCO5)OC)OC	mol	0.000512558	1701.31	6
SGL1	Α-Spinasterol	CC[C@@H](C(C)C)/C=C/[C@H]([C@H]1CC[C@@H]2[C@]1(C)CC[C@H]1C2=CC[C@@H]2[C@]1(C)CC[C@@H](C2)O)C	mol	0.000524934	849.297	5
RDT14	2-Ethylhexan-1-Ol	CCCCC(CO)CC	mol	0.000486618	7.29056	4
NX12	delta 7-stigmastenol	CCC(CCC(C)C1CCC2C1(CCC3C2=CCC4C3(CCC(C4)O)C)C)C(C)C	mol	0.000533903	39.2697	3
YYR8	(6Z,10E,14E,18E)-2,6,10,15,19,23-hexamethyltetracosa-2,6,10,14,18,22-hexaene	CC(=CCCC(=CCCC(=CCCC=C(C)CCC=C(C)CCC=C(C)C)C)C)C	mol	0.000511509	55.4628	3
NX5	epiberberine	COC1=C(C=C2C(=C1)CC[N+]3=C2C=C4C=CC5=C(C4=C3)OCO5)OC	mol	0.000528821	53.4616	3
NX16	28-norolean-17-en-3-ol	CC1(C)CCC2=C(C1)[C@@H]1CC[C@@H]3[C@]4(C)CC[C@@H](O)C(C)(C)[C@H]4CC[C@@]3(C)[C@]1(C)CC2	mol	0.000528262	22.5182	3
NX6	Spinasterol	CCC(C=CC(C)C1CCC2C1(CCC3C2=CCC4C3(CCC(C4)O)C)C)C(C)C	mol	0.000506842	9.13964	2
CX1	FA	Nc1nc2ncc(CNc3ccc(C(=O)N[C@@H](CCC(=O)O)C(=O)O)cc3)nc2c(=O)[nH]1	mol	0.000366435	1126	2
SGL3	Lucyin	O=C[C@]1(C)[C@@H](O)CC[C@]2([C@H]1CC[C@@]1([C@@H]2CC=C2[C@@]1(C)CC[C@@]1([C@H]2CC([C@H](C1)O)(C)C)C(=O)[O-])C)C	mol	0.000382702	21.1962	2
RDT6	Dodecanoate	CCCCCCCCCCCC(=O)O	mol	0.000484262	1126	2
SGL2	Machaerinic Acid Lactone	O[C@H]1CC[C@]2([C@H](C1(C)C)CC[C@@]1([C@@H]2CC=C2[C@@]1(C)CC[C@]13[C@H]2CC(C)(C)[C@H](C1)OC3=O)C)C	mol	0.000382702	21.1962	2
HB12	Obacunone	CC1(C2CC(=O)C3(C(C2(C=CC(=O)O1)C)CCC4(C35C(O5)C(=O)OC4C6=COC=C6)C)C)C	mol	0.000503271	1126	2
NX7	poriferasta-7,22E-dien-3beta-ol	CCC(C=CC(C)C1CCC2C1(CCC3C2=CCC4C3(CCC(C4)O)C)C)C(C)C	mol	0.000506842	9.13964	2
YYR2	Sitosterol alpha1	CC=C(CCC(C)C1CCC2C1(CCC3C2=CCC4C3(CCC(C4C)O)C)C)C(C)C	mol	0.000520562	33.0182	2
CZ4	NSC63551	CCC(C=CC(C)C1CCC2C1(CCC3C2CCC4C3(CCC(=O)C4)C)C)C(C)C	mol	0.00049776	18.1467	2
