# Supplementary material for: Exploring the mechanism of action of Modified Simiao Powder in the treatment of osteoarthritis: an in-silico study
Source: Front Med (Lausanne). 2024 Oct 18;11:1422306. doi: 10.3389/fmed.2024.1422306 (PMC11527633; doi:10.3389/fmed.2024.1422306)
Supplement: Supplementary file 7 [file Table_7.XLSX]

## Sheet: Targets of OA
A2M
ABCB1
ABCB11
ABCB6
ABCC1
ABCC11
ABCC2
ABCC3
ABCC4
ABCC5
ABCC6
ABCG2
ACAA2
ACAN
ACE
ACHE
ACLY
ACO1
ACTB
ACVRL1
ADAM12
ADAM15
ADAM17
ADAMTS1
ADAMTS12
ADAMTS14
ADAMTS16
ADAMTS3
ADAMTS4
ADAMTS5
ADAMTS7
ADAMTS9
ADGRG2
ADIPOQ
ADIPOR1
ADIPOR2
ADM
AEBP1
AGER
AGTR1
AHR
AHSA1
AIMP2
AIP
AK4
AKR1B1
AKR1B10
AKR1C1
AKR1C2
AKR1C3
AKR1C4
AKR1D1
AKT1
ALB
ALCAM
ALDH1A2
ALOX15
ALOX5
ALPL
AMACR
ANAPC4
ANGPT1
ANGPTL3
ANGPTL4
ANK1
ANKH
ANP32A
ANXA1
ANXA6
APLN
APOA1
APOE
APRT
AQP1
AR
ARHGEF2
ARHGEF7
ARMH1
ARSB
ASCC1
ASIC1
ASPN
ASPRV1
ASPSCR1
ATF3
ATG5
ATP1A3
ATP4A
ATP6V1B2
ATP7B
AURKA
AVL9
B2M
BAX
BBC3
BCHE
BCL2
BDKRB1
BDKRB2
BDNF
BECN1
BEST1
BGLAP
BGN
BMP2
BMP4
BMP5
BMP6
BMP7
BRD4
BSG
BTNL2
BUD31
C1QBP
C4BPA
C5AR1
CA2
CA3
CALCA
CALCR
CALM1
CALM2
CALM3
CALR
CAMK2B
CANT1
CAPG
CARD14
CASP1
CASP3
CASP8
CASR
CAT
CCL11
CCL17
CCL2
CCL20
CCL22
CCL5
CCN1
CCN2
CCN3
CCN4
CCN5
CCN6
CCNB1
CCND1
CCR2
CCR3
CCR5
CCR6
CD14
CD163
CD19
CD34
CD38
CD40
CD44
CD46
CD68
CD82
CD86
CDH11
CDH5
CDKN2A
CDKN2D
CEBPB
CEMIP
CES1
CFAP97
CFTR
CHADL
CHAT
CHI3L1
CHI3L2
CHST11
CHUK
CILP
CIRBP
CISH
CLCN7
CLCNKA
CLEC3A
CLEC4D
CLIC1
CLIC4
CLOCK
CLU
CMC1
CMKLR1
CNGB1
CNMD
CNR1
COG5
COL10A1
COL11A1
COL11A2
COL1A1
COL1A2
COL2A1
COL3A1
COL5A1
COL5A2
COL6A2
COL9A1
COL9A2
COL9A3
COMP
CPB1
CPNE4
CPSF6
CRADD
CRAT
CREB1
CRH
CRK
CRLF1
CRP
CRYAB
CSF1R
CSF2
CSF3
CTHRC1
CTNNB1
CTSB
CTSD
CTSK
CTSL
CTSS
CX3CL1
CX3CR1
CXCL1
CXCL10
CXCL12
CXCL13
CXCL2
CXCL6
CXCL8
CXCL9
CXCR1
CXCR2
CXCR3
CXCR4
CXCR5
CYBA
CYBB
CYP11B1
CYP11B2
CYP17A1
CYP19A1
CYP1A2
CYP1B1
CYP2A6
CYP2B6
CYP2C18
CYP2C19
CYP2C8
CYP2C9
CYP2D6
CYP2E1
CYP3A4
CYP3A43
CYP3A5
CYP3A7
CYP4A11
DANCR
DAPP1
DBH
DCN
DDR2
DDX3X
DECR1
DIO2
DKK1
DKK2
DMD
DMP1
DNMT1
DNMT3A
DNMT3B
DOT1L
DPEP1
DPP4
DPYSL2
DUS4L
DUSP1
DYNC1I1
EBI3
EBNA1BP2
EDIL3
EDN1
EEF2
EFEMP1
EFEMP2
EGFR
EGLN1
EGR1
EIF2AK2
ELANE
ELAVL2
ELF3
ENO1
ENPP1
EPAS1
EPHB2
ERN1
ESD
ESR1
ESR2
ESRRG
ETFA
ETS1
ETS2
EXT1
EXT2
EZH2
EZR
F2RL1
F8
F9
FAAH
FABP2
FABP4
FAM53A
FAS
FBRS
FBXO8
FCGR3A
FCGR3B
FGF1
FGF18
FGF2
FGF23
FGFR1
FGFR2
FGFR3
FHL2
FIS1
FLT1
FLT4
FMOD
FN1
FOS
FOSB
FOXM1
FOXO3
FOXO4
FOXP3
FRZB
FSTL1
FTL
FTO
FUT1
GABPA
GABRA1
GABRA2
GABRA3
GABRA4
GABRA5
GABRA6
GABRB1
GABRB2
GABRB3
GABRD
GABRE
GABRG1
GABRG2
GABRG3
GABRP
GABRQ
GALNS
GAPDH
GDE1
GDF5
GDNF
GFER
GGCX
GHR
GJA1
GLA
GLB1
GLI1
GLIS3
GLO1
GLP1R
GLRA1
GLS
GLT8D1
GLUL
GNAQ
GNAS
GNL3
GORASP1
GP1BA
GPI
GPNMB
GPR101
GPR22
GPR39
GRAP2
GREM1
GRIN2B
GRN
GRP
GSTK1
GSTM1
GSTP1
GUSB
GZMA
HABP2
HABP4
HADHA
HAPLN1
HAPLN3
HAS1
HAVCR2
HBP1
HDAC1
HDAC2
HDAC4
HDAC7
HECW1
HEXB
HFE
HGD
HIBCH
HIF1A
HLA-DPA1
HLA-DPB1
HLA-DRB1
HMGA2
HMGB1
HMGB2
HMMR
HMOX1
HOXD9
HPGD
HPGDS
HPSE
HRH2
HS6ST2
HSD11B1
HSD11B2
HSPA4
HSPA5
HTRA1
HYAL1
HYAL2
HYAL3
HYAL4
ICAM1
IDH2
IDH3A
IDS
IDUA
IFNG
IGF1
IGF2
IGFBP7
IL10
IL11
IL13
IL15
IL16
IL17A
IL17F
IL18
IL18R1
IL1A
IL1B
IL1R1
IL1RN
IL2
IL21
IL22
IL23A
IL3
IL32
IL33
IL34
IL37
IL4
IL5
IL6
IL6R
IL6ST
IL7
IL9
IMMT
IMPG2
INHBA
IRF1
IRF4
IRF5
ISOC2
ITGA4
ITGA6
ITGB1
ITGB2
JAG1
JAK2
JUN
JUNB
JUND
KCNQ2
KCNQ3
KDM6B
KDR
KHDRBS1
KIF22
KIF26B
KIF7
KIRREL3
KL
KLF2
KNG1
LANCL1
LAYN
LCN2
LEF1
LEP
LEPR
LGALS1
LGALS3
LGR4
LIF
LMNA
LMX1B
LOXL2
LPAR1
LRCH1
LRP1
LRP5
LRPPRC
LRRC32
LTBP1
LTBP3
LUM
LYVE1
MAOA
MAP1LC3B
MAP3K7
MAPK1
MAPK12
MAPK14
MAPK3
MAPK8
MAPT
MATN1
MATN3
MCF2L
MCL1
MEFV
MFAP1
MFHAS1
MGP
MIA
MIP
MMP1
MMP12
MMP13
MMP19
MMP2
MMP3
MMP7
MMP8
MMP9
MMRN1
MOK
MPHOSPH9
MPO
MRC1
MRPL49
MSC
MSN
MSTN
MTF1
MTOR
MTRR
MVP
MYC
MYD88
MYH13
MYOF
MYOG
NAMPT
NAT2
NAV3
NCAN
NCOA3
NDUFS8
NDUFV1
NEU1
NFATC2
NFE2L2
NFKB1
NGF
NGFR
NHS
NLRP3
NME2
NME8
NODAL
NOS2
NOTCH1
NOX4
NQO1
NR0B1
NR1D1
NR1H2
NR1H3
NR1I2
NR3C1
NR4A1
NTN1
NTRK1
OLR1
OMD
OPA1
OPCML
OPRK1
OPTC
OSCAR
OSM
P2RX4
P2RX7
P3H3
PADI2
PADI4
PAEP
PANK2
PANX3
PAPSS2
PAQR7
PAX5
PCNA
PDCD5
PDCD6IP
PDE1C
PDHA1
PDPK1
PECAM1
PFKFB3
PGD
PGPEP1
PHB2
PHEX
PHLPP1
PIEZO1
PIK3CA
PIK3CB
PIK3CD
PIK3CG
PITX1
PLA2G1B
PLA2G2A
PLA2G4A
PLAAT4
PLCD1
PLCG1
PLG
PLOD2
PLS3
POLDIP2
POMC
PON1
POSTN
POU3F3
PPARA
PPARD
PPARG
PPP1R11
PPP2R1A
PRDX2
PRELP
PRG4
PRKAA1
PRKAA2
PRKAB1
PRKCZ
PRKN
PRNP
PSEN1
PSEN2
PSMB1
PSMD7
PTCH1
PTEN
PTGDR2
PTGER1
PTGER4
PTGES
PTGES3
PTGR2
PTGS1
PTGS2
PTH
PTH1R
PTHLH
PTK2
PTK2B
PTN
PTPN1
PTRH1
PYCARD
RABEPK
RAC1
RACK1
RAN
RAPH1
RARRES2
RBM6
RCN3
REG1A
RELA
REN
RENBP
RETN
RHOB
RIPK1
RNF19A
ROM1
ROS1
RPSA
RSPO2
RUNX2
RXRA
RYR3
S100A1
S100A10
S100A11
S100A12
S100A4
S100A7
S100A8
S100A9
S100B
SCARB2
SCN10A
SCN3A
SCN4A
SCN9A
SCRN1
SCUBE1
SDC1
SDC4
SDCBP
SDHA
SEC23A
SELE
SEMA3A
SEMA4A
SEMA6A
SERPINA6
SERPINA7
SERPINE1
SFRP1
SFRP2
SFRP4
SFTPD
SGCG
SGSH
SHBG
SIGMAR1
SIRT1
SIRT3
SIRT6
SLC10A1
SLC16A1
SLC16A7
SLC22A1
SLC22A11
SLC22A2
SLC22A6
SLC22A7
SLC22A8
SLC26A2
SLC2A1
SLC2A2
SLC2A3
SLC2A4
SLC39A8
SLC40A1
SLC44A2
SLC47A1
SLC52A1
SLC6A2
SLC6A3
SLC6A4
SLCO1A2
SLCO1B1
SLCO1C1
SLCO2B1
SLPI
SMAD1
SMAD2
SMAD3
SMURF2
SNRPN
SNURF
SOCS1
SOCS3
SOD1
SOD2
SORBS2
SOST
SOX11
SOX9
SPAG9
SPAM1
SPP1
SQSTM1
SRD5A2
SREBF2
SRY
SSRP1
ST14
STAB2
STAT1
STAT3
STMN1
STMN2
STS
SULF1
SULF2
SULT1A1
SULT1A3
SUMO2
SUPT3H
SYT1
SYVN1
TAC1
TACR1
TARDBP
TBC1D1
TBX5
TCF4
TDO2
TFPI2
TGFA
TGFB1
TGFB2
TGFB3
TGFBI
TGFBR1
TGFBR2
TGM2
THBD
THBS1
THBS4
THY1
TIMP1
TIMP2
TIMP3
TIMP4
TKTL1
TLR2
TLR3
TLR4
TLR9
TMEM241
TNC
TNF
TNFAIP6
TNFRSF11A
TNFRSF11B
TNFRSF1A
TNFRSF1B
TNFRSF6B
TNFSF10
TNFSF11
TNFSF13B
TNFSF14
TNFSF15
TNKS
TNNC1
TP53
TP63
TRAF3
TRAF6
TRAP1
TREM1
TRIM2
TRIM63
TRPS1
TRPV1
TRPV4
TRPV5
TSC1
TSKU
TTN
TTR
TWIST1
TXN
TXNRD1
TYROBP
UCMA
UFSP2
UGT1A1
UGT1A10
UGT1A3
UGT1A6
UGT1A7
UGT1A8
UGT1A9
UGT2B15
UGT2B4
UGT2B7
ULK1
UNC5C
UQCC1
VCAM1
VCAN
VDAC2
VDR
VEGFA
VEGFC
VIM
VIP
VTN
WNK1
WNT16
WNT3A
WNT5A
WWP2
XCL1
XYLT1
YAP1
YWHAQ
ZC3H12A
ZFP36
ZMPSTE24
ZNF687
